# Supplementary material for: Biomarker analysis of the NeoSphere study: pertuzumab, trastuzumab, and docetaxel versus trastuzumab plus docetaxel, pertuzumab plus trastuzumab, or pertuzumab plus docetaxel for the neoadjuvant treatment of HER2-positive breast cancer
Source: PubMed Central journal article supplement (PMC5299741; doi:10.1186/s13058-017-0806-9), 2017-02-09

Group A: trastuzumab + docetaxel

pCR rate (95% CI)

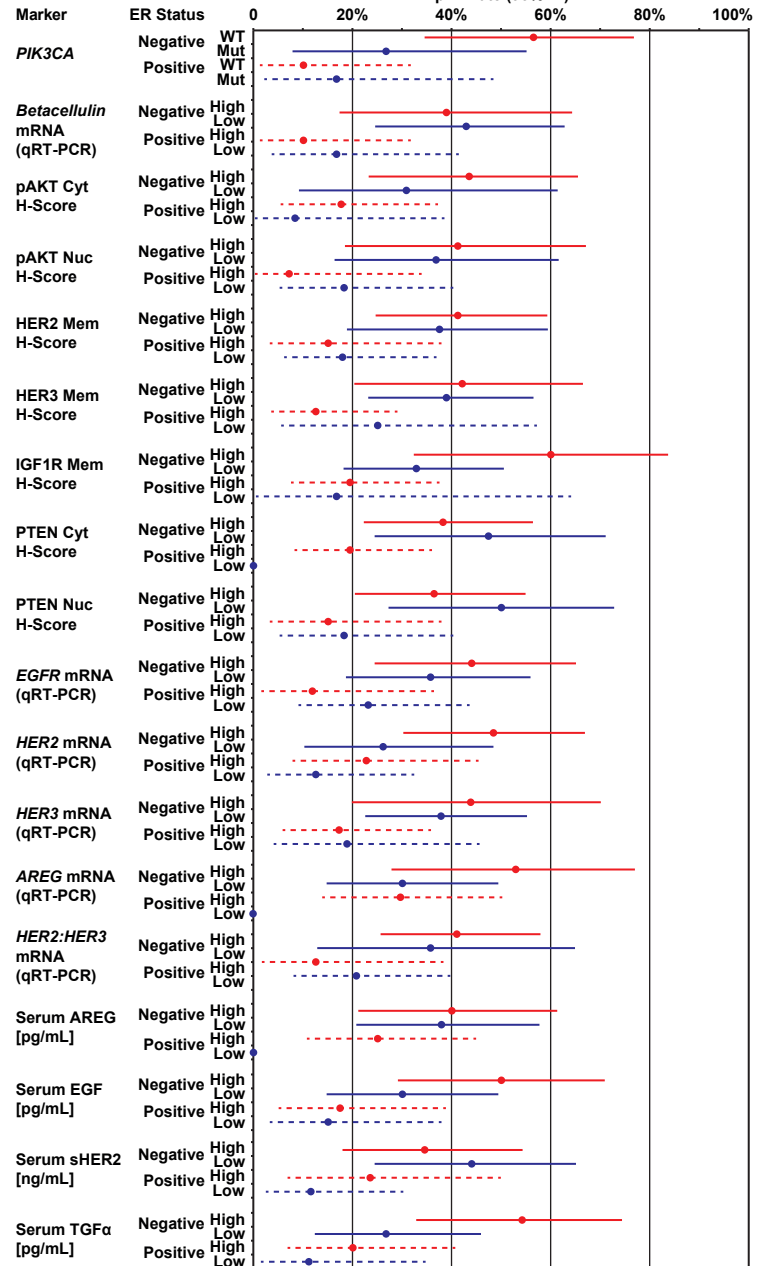

Group B: trastuzumab + pertuzumab + docetaxel

pCR rate (95% CI)

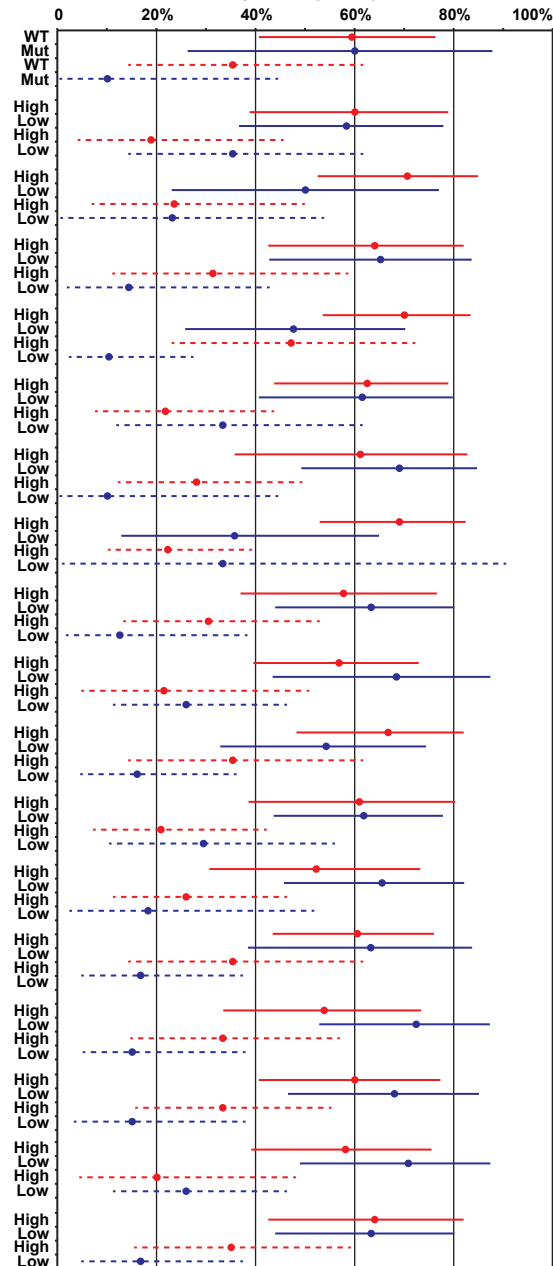

Group C: trastuzumab + pertuzumab

pCR rate (95% CI)

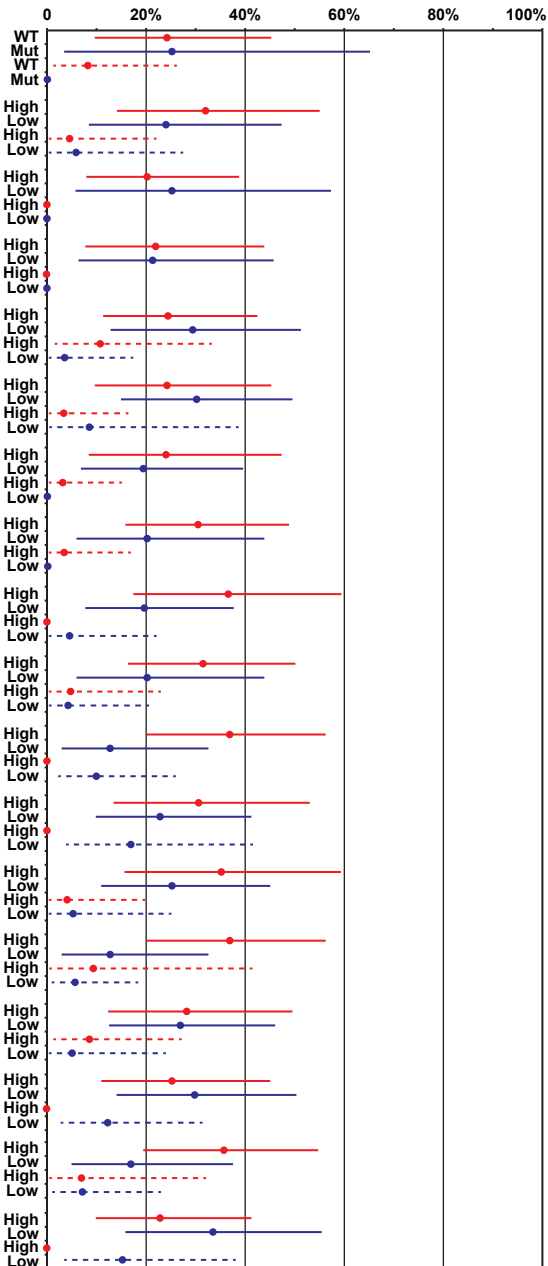

Group D: pertuzumab + docetaxel

pCR rate (95% CI)

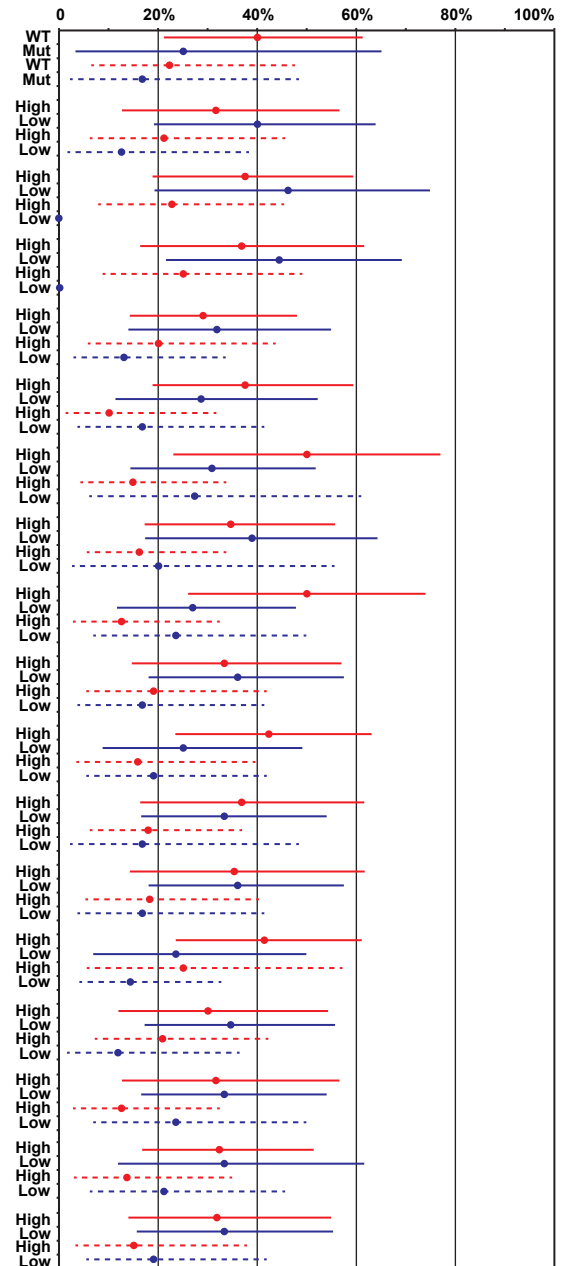

Supplement: 13058_2017_806_MOESM2_ESM.pdf [file 13058_2017_806_MOESM2_ESM.pdf]
